# Supplementary material for: Evaluating the implementation of a referral system for virtual pharmacy counselling in a province-wide nurse phone line
Source: PubMed Central journal article supplement — Healthc Manage Forum. 2023 Jan 29;36(2):107–12. doi: 10.1177/08404704221147454 (PMC9975893; doi:10.1177/08404704221147454), 2023-01-29
Supplement: sj-pdf-1-hmf-10.1177_08404704221147454.pdf [file sj-pdf-1-hmf-10.1177_08404704221147454.pdf]

## Supplementary material

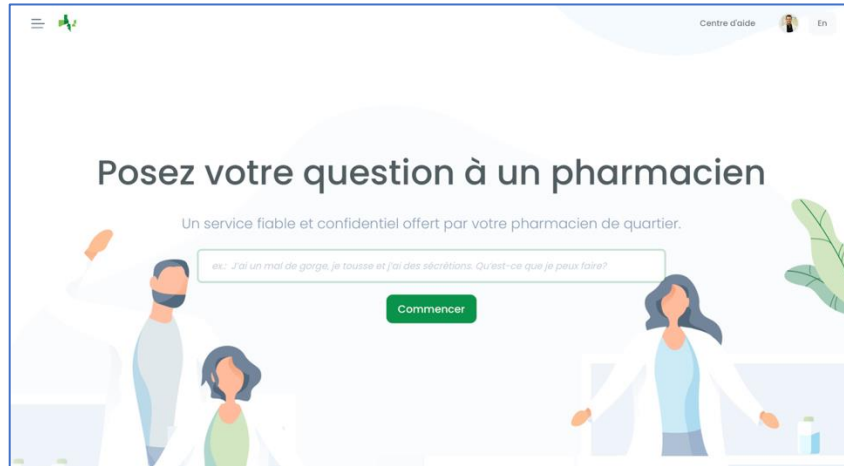

Figure 1. The AYP platform user interface (askyourpharmacist.ca)

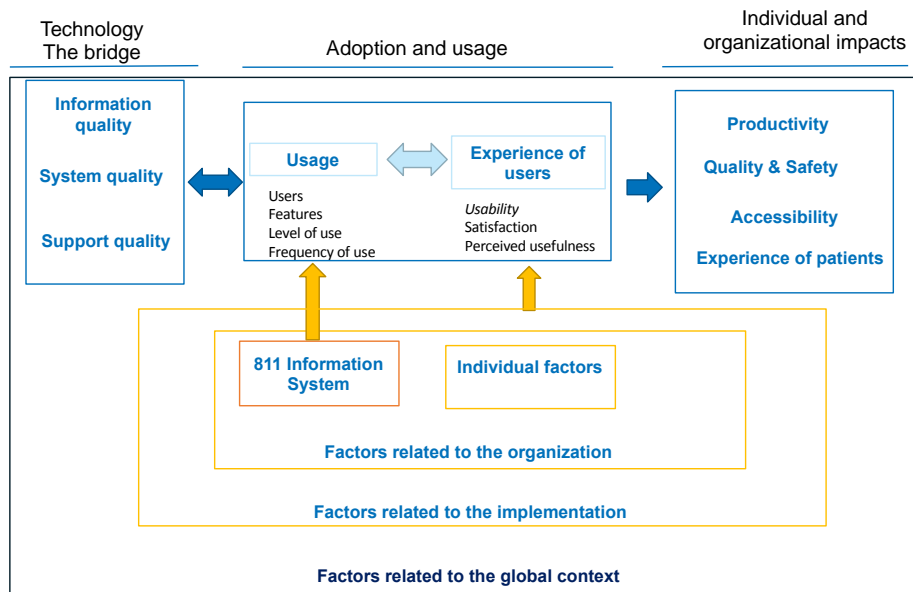

Figure 2. Analytic framework

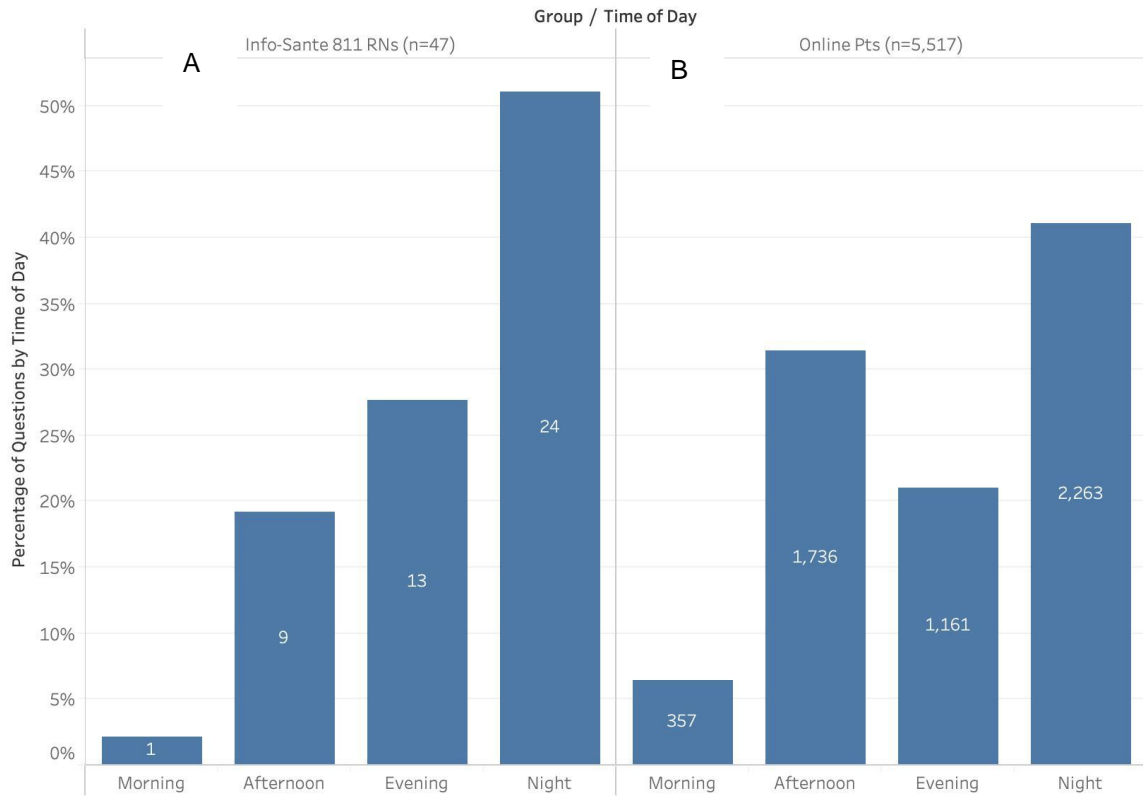

Figure 3. Time of day for questions received on AYP originating from 811 (A) and directly online from patients (B). (morning: 6am until noon; afternoon : noon until 6pm ; evening : 6pm until midnight ; night :midnight until 6am)

Table 1

Table 1. Participants to the interviews.

| Organization and role | Number of interviews | Number of years of Info-Santé or AYP experience                 |
|-----------------------|----------------------|-----------------------------------------------------------------|
| <b>811 Info-Santé</b> |                      |                                                                 |
| Day nurses            | 3                    | > 5 years: 3                                                    |
| Night nurses          | 5                    | less than 2 years: 3<br>2 to 5 years: 1<br>more than 5 years: 1 |
| Managers              | 2                    |                                                                 |
| Nurse/Researcher      | 1                    |                                                                 |
| <b>AYP</b>            |                      |                                                                 |
| Designer              | 2*                   |                                                                 |
| Pharmacists           | 4                    | less than 2 years: 2<br>2 to 5 years: 1<br>more than 5 years: 1 |
| <b>Managers</b>       | 5*                   |                                                                 |
| Total                 | 22                   |                                                                 |

\*: two people were interviewed more than once, which explains the number of people as 19 and the number of interviews as 22.
